# Supplementary material
Source: PubMed Central journal article supplement (PMC7204366)
Supplement: i1537-2073-22-2-85_s01.pdf [file i1537-2073-22-2-85_s01.pdf]

**Table S1. Reported cases of postvaccination CNS inflammatory disease (2008-2018)**

| Citation              | Age (Y) | Sex | Types of Vaccination                               | Onset Time of Initial Symptoms Post-Vaccination | Diagnosis                                 | MRI Imaging                                                             | CSF Findings                                      | Treatment                                                   | Prognosis               | Recurrence                                                                       |
|-----------------------|---------|-----|----------------------------------------------------|-------------------------------------------------|-------------------------------------------|-------------------------------------------------------------------------|---------------------------------------------------|-------------------------------------------------------------|-------------------------|----------------------------------------------------------------------------------|
| Huynh et al. 2008     | 61      | M   | Seasonal influenza                                 | 21 days                                         | Bilateral Optic neuritis followed by ADEM | Initially negative then supratentorial and infratentorial demyelination | PMN pleocytosis and elevated protein, no OCBs     | IVMP followed by oral steroids                              | Significant improvement | Yes ON then ADEM two months later. No recurrence after ADEM attack (8 month F/U) |
| Sacheli et al. 2014   | 50      | M   | Influenza (H1N1, H3N2, B/Yamagata, and B/Victoria) | 1 day                                           | ADEM                                      | Periventricular, subcortical, and cortical demyelination                | Normal                                            | IVMP followed by oral prednisone                            | Significant improvement | Unknown F/U                                                                      |
| Yuan et al. 2016      | 12      | M   | Hepatitis B                                        | 21 days                                         | ADEM                                      | Abnormal multifocal brain and cervical lesions                          | Lymphocytic pleocytosis, positive OCBs            | IVMP and IVIG                                               | Complete resolution     | No (4 month F/U)                                                                 |
| Van Ussel et al. 2014 | 26      | F   | Influenza (A/H1N1)                                 | 5 days                                          | ADEM                                      | T2-hyperintense signal intensity changes in the deep white matter       | PMN pleocytosis and Elevated CSF protein, no OCBs | Acyclovir, corticosteroids, PLEX, decompressive craniotomy, | vegetative then death   | N/A, patient died                                                                |
| Shoamanesh            | 75      | F   | Inactivated                                        | 2 days                                          | ADEM                                      | Infratentorial                                                          | Lymphocytic                                       | IVMP,                                                       | No                      | N/A, patient                                                                     |

|                       |    |   |                                        |         |                |                                                                                                                |                                              |                |                                                                                            |                   |
|-----------------------|----|---|----------------------------------------|---------|----------------|----------------------------------------------------------------------------------------------------------------|----------------------------------------------|----------------|--------------------------------------------------------------------------------------------|-------------------|
| et al. 2011           |    |   | influenza                              |         |                | demyelination and LETM                                                                                         | pleocytosis and elevated protein             | PLEX           | response; death 70 days after vaccination                                                  | died              |
| Lapphra et al. 2010   | 2  | M | H1N1 influenza                         | 4 days  | Optic neuritis | Diffuse high intensity in cerebellum, left basal ganglia, optic nerves                                         | Normal                                       | IVMP           | Complete resolution                                                                        | No (6 months F/U) |
| Turkoglu & Tuzun 2009 | 44 | M | Seasonal influenza                     | 9 days  | ADEM           | T2 weighted hyperintense lesion from pons to midbrain and caudal diencephalon with post-gadolinium enhancement | Normal                                       | IVMP           | Complete resolution                                                                        | No (6 months F/U) |
| Machicado et al. 2013 | 83 | F | Inactivated influenza                  | 8 days  | ADEM           | Periventricular white matter                                                                                   | Lymphocytic pleocytosis and elevated protein | IVMP then PLEX | Initial improvement with PLEX; patient died after 3 months with pneumonia and septic shock | No (3 month F/U)  |
| Rubinov et al. 2012   | 18 | M | Inactivated influenza                  | 14 days | Optic neuritis | Thickening of intracranial portions of optic nerves                                                            | Normal                                       | IVMP           | Complete resolution                                                                        | No (9 months F/U) |
| Crawford et al. 2012  | 13 | M | Live attenuated influenza vaccine      | N/A     | Optic neuritis | Diffuse enlargement of optic chiasm with inflammation of distal optic nerves bilaterally                       | Normal                                       | IVMP           | Significant improvement                                                                    | No (2 months F/U) |
| Fujii et al. 2012     | 2  | M | Inactivated H1N1 influenza vaccination | 25 days | ADEM           | Multiple subcortical white matter lesions                                                                      | Normal                                       | IVMP           | Complete resolution                                                                        | No (1 month F/U)  |

|                       |    |   |                                                                                      |                                |                         |                                                                                                                 |                                                             |                                    |                         |                                                         |
|-----------------------|----|---|--------------------------------------------------------------------------------------|--------------------------------|-------------------------|-----------------------------------------------------------------------------------------------------------------|-------------------------------------------------------------|------------------------------------|-------------------------|---------------------------------------------------------|
| Maeda et al. 2012     | 33 | F | Trivalent inactivated influenza vaccine                                              | 15 days                        | ADEM                    | Cerebral and thoracic demyelination                                                                             | Elevated protein, positive OCBs                             | IVMP followed by oral prednisolone | Complete resolution     | No (4 month F/U)                                        |
| Fernandes et al. 2011 | 5  | M | H1N1 influenza                                                                       | 2 days                         | ADEM                    | Right frontal and bilateral thalamic lesions                                                                    | Lymphocytic pleocytosis                                     | IVMP                               | Significant improvement | Unknown F/U                                             |
| Lee et al. 2011       | 2  | M | H1N1 influenza                                                                       | 5 days                         | ADEM                    | Multiple patchy hyperintense lesions in frontal and parietal subcortical white matter and left thalamus         | Lymphocytic pleocytosis and elevated protein                | IV Dexamethasone                   | Complete resolution     | No (12 month F/U)                                       |
| Hoshino et al. 2012   | 36 | M | H1N1 influenza                                                                       | 10 days                        | ADEM (and GBS)          | No initial abnormalities; 22 days later showed multiple lesions in the white matter, brainstem, cervical spinal | Lymphocytic pleocytosis and elevated protein                | IVMP                               | Significant improvement | No (3 month F/U)                                        |
| Sato et al. 2011      | 77 | F | Seasonal influenza (trivalent, inactivated) and A/H1N1 (inactivated) one month later | 1 day after second vaccination | Transverse myelitis     | LETM                                                                                                            | Normal protein, WBC; increased IL-6                         | IVMP followed by oral prednisolone | Limited improvement     | No (8 month F/U)                                        |
| Kitazawa et al. 2012  | 87 | M | 23 valent pneumococcal                                                               | Few days                       | NMOSD with AQP4 relapse | Enhancement and enlargement of optic chiasm and LETM                                                            | Slight elevation of protein and IgG and abnormally elevated | IVMP                               | Partial improvement     | Had a second relapse of his NMOSD following vaccination |

|                       |         |   |                                 |          |                                 |                                                                                                     |                                                                  |          |                                 |                                               |                                         |
|-----------------------|---------|---|---------------------------------|----------|---------------------------------|-----------------------------------------------------------------------------------------------------|------------------------------------------------------------------|----------|---------------------------------|-----------------------------------------------|-----------------------------------------|
|                       |         |   |                                 |          |                                 |                                                                                                     | myelin basic protein level                                       |          |                                 |                                               | (presenting relapse was before vaccine) |
| Huang et al. 2009     | 39      | M | Hep A vaccination (HIV patient) | 6 days   | Optic neuritis                  | Left optic nerve enhancement                                                                        | Lymphocytic pleocytosis                                          | IVMP     | Significant improvement         | No (14 month F/U)                             |                                         |
| Erguven et al. 2009   | 9       | F | Hepatitis B                     | 1 week   | Optic neuritis                  | N/A                                                                                                 | Normal                                                           | IVMP     | Complete resolution             | No (long-term F/U)                            |                                         |
| Moradian et al. 2008  | 15      | M | Measles-Rubella                 | 6 hours  | Optic neuritis                  | Normal                                                                                              | Normal                                                           | IVMP     | Significant improvement         | No (1 week F/U)                               |                                         |
| Aydin et al. 2010     | 6 month | M | DTAP                            | 6 days   | ADEM necrotizing encephalopathy | Symmetrical increased signal intensities in both thalami and posterior limb of the internal capsule | Normal                                                           | N/A      | Partial improvement             | No (6 months F/U)                             |                                         |
| Chaves et al. 2009    | 56      | M | Yellow Fever                    | 45 days  | Transverse myelitis             | LETM                                                                                                | Lymphocytic pleocytosis                                          | None     | Complete resolution             | No (5 days F/U)                               |                                         |
| Cisse et al. 2012     | 28      | F | Tetanus                         | 15 days  | ADEM                            | Left mesencephalic hypersignal, LETM                                                                | Normal                                                           | IVMP     | Complete resolution             | No (1 year F/U)                               |                                         |
| Furukawa et al. 2010  | 15      | M | Japanese encephalitis           | Few days | NMO with unknown AQP4           | Swelling of bilateral optic nerves and LETM                                                         | Elevated protein, IgG, myelin basic protein and mild pleocytosis | Steroids | Complete resolution             | Unknown F/U                                   |                                         |
| Wildemann et al. 2009 | 20      | F | Quadrivalent HPV                | 28 days  | ADEM                            | Multifocal enhancing white matter edema                                                             | Increased total protein and IgM ratio                            | Steroids | Improvement in-between relapses | Yes; relapsed twice after steroids cessation. |                                         |

|                      |    |   |                             |         |            |                                                                                                       |        |      |                     |                                                                    |
|----------------------|----|---|-----------------------------|---------|------------|-------------------------------------------------------------------------------------------------------|--------|------|---------------------|--------------------------------------------------------------------|
|                      |    |   |                             |         |            |                                                                                                       |        |      |                     | Developed multiphasic ADEM                                         |
| Schaffer et al. 2008 | 15 | F | HPV 16 and 18               | 23 days | ADEM       | Disseminated lesions in the right frontal subcortical area and brainstem and the cervical spinal cord | Normal | IVMP | Complete resolution | No (3 weeks F/U)                                                   |
| Sutton et al. 2009   | 16 | F | Quadrivalent HPV (Gardasil) | 21 days | CIS        | Subcortical, cervical, and thoracic demyelination                                                     | N/A    | IVMP | Complete resolution | Unknown F/U                                                        |
|                      | 25 | F | Quadrivalent HPV (Gardasil) | 16 days | CIS        | Left parietal cortical/subcortical                                                                    | N/A    | IVMP | Complete resolution | Unknown F/U                                                        |
|                      | 21 | F | Quadrivalent HPV (Gardasil) | 1 day   | MS relapse | Cerebral and cervical demyelination                                                                   | N/A    | IVMP | Complete resolution | Unknown F/U. Diagnosed with clinically definite MS at presentation |
|                      | 26 | F | Quadrivalent HPV (Gardasil) | 4 days  | MS relapse | Cerebral, cervical, and thoracic demyelination                                                        | N/A    | IVMP | Complete resolution | Unknown F/U. Diagnosed with clinically definite MS at presentation |
|                      | 16 | F | Quadrivalent                | 4 days  | MS relapse | Cerebral, cervical, and                                                                               | N/A    | None | Complete            | Unknown                                                            |

|                     |    |   |                                                             |                                                                 |                                     |                                                                                                                                                         |                              |                                                          |                         |                                                                                                        |
|---------------------|----|---|-------------------------------------------------------------|-----------------------------------------------------------------|-------------------------------------|---------------------------------------------------------------------------------------------------------------------------------------------------------|------------------------------|----------------------------------------------------------|-------------------------|--------------------------------------------------------------------------------------------------------|
|                     |    |   | nt HPV (Gardasil)                                           |                                                                 |                                     | thoracic demyelination                                                                                                                                  |                              |                                                          | Resolution              | F/U. Diagnosed with clinically definite MS at presentation                                             |
| DiMario et al. 2010 | 16 | F | HPV                                                         | 10 days                                                         | ADEM + Optic neuritis               | Swollen enhancement within chiasm extending into both retrobulbar optic nerves and a right occipito-parietal lobe mass with surrounding vasogenic edema | Normal                       | IVMP, PLEX                                               | Partial improvement     | No (18 month F/U)                                                                                      |
| Chang et al. 2011   | 19 | F | Quadrivalent HPV (Garadasil)                                | 1 month                                                         | Transverse myelitis then de novo MS | Cerebral, cervical, and thoracic demyelination                                                                                                          | N/A                          | IVMP and 4 months later natalizumab                      | Complete resolution     | Yes; no clinical recurrence but new lesions noted at 1 year F/U. Developed MS by radiological criteria |
|                     | 18 | F | Meningococcal and Quadrivalent HPV/Gardasil (3 weeks later) | 3 weeks after meningococcal; optic neuritis noted 6 weeks after | ADEM then de novo MS                | Cerebral and cervical demyelination                                                                                                                     | Pleocytosis and elevated MBP | Oral methylprednisolone and IVIG; IVMP, IVIG, glatiramer | Significant improvement | Yes, recurrence in 1 month with new paresthesias and contrast enhancing                                |

|                           |    |   |                |           |                     |                                                                                                            |                                              |                          |                         |                                                             |
|---------------------------|----|---|----------------|-----------|---------------------|------------------------------------------------------------------------------------------------------------|----------------------------------------------|--------------------------|-------------------------|-------------------------------------------------------------|
|                           |    |   |                | Gardasil  |                     |                                                                                                            |                                              | acetate after recurrence |                         | lesions. Developed MS by clinical and radiological criteria |
| Akkad et al. 2010         | 27 | F | H1N1 influenza | 4 days    | Transverse myelitis | LETM                                                                                                       | Lymphocytic pleocytosis                      | IVMP and PLEX            | Significant improvement | No (6 weeks F/U)                                            |
| Denholm et al. 2010       | 38 | M | H1N1 influenza | 10 days   | Transverse myelitis | LETM                                                                                                       | Lymphocytic pleocytosis and elevated protein | IVMP                     | Complete resolution     | Unknown F/U                                                 |
|                           | 19 | F | H1N1 influenza | 21 days   | Transverse myelitis | LETM                                                                                                       | Lymphocytic pleocytosis and elevated protein | IVMP                     | Partial improvement     | Unknown F/U                                                 |
| Gui et al. 2011           | 13 | M | H1N1 influenza | 5 days    | Transverse myelitis | LETM                                                                                                       | Normal                                       | IVMP                     | Significant improvement | No (6 months F/U)                                           |
| Korn-Lubetzki et al. 2011 | 44 | M | H1N1 influenza | 1 month   | Transverse myelitis | LETM                                                                                                       | Normal                                       | IVMP                     | Clinical resolution     | Unknown F/U                                                 |
| Pellegrino et al. 2013    | 13 | F | HPV            | 16 months | ADEM                | Multiple ring-enhancing lesions located primarily in thalamic, pons, and insula white matter               | Normal                                       | IVMP                     | Complete resolution     | Unknown F/U                                                 |
|                           | 12 | F | HPV            | 15 days   | ADEM                | Multiple ring-enhancing lesions at subcortical levels, pons, trigeminal nuclei and mesencephalon with LETM | Lymphocytic pleocytosis                      | IVMP                     | Significant improvement | Unknown F/U                                                 |

|                                |    |   |                  |          |                                                 |                                           |                                                                        |                                              |                                 |                                |
|--------------------------------|----|---|------------------|----------|-------------------------------------------------|-------------------------------------------|------------------------------------------------------------------------|----------------------------------------------|---------------------------------|--------------------------------|
| Mendoza Plascencia et al. 2010 | 17 | F | HPV              | 15 days  | ADEM                                            | Cortical and subcortical demyelination    | Normal                                                                 | IVMP followed by oral prednisone             | Complete resolution             | No (2 months F/U)              |
| Sekiguchi et al. 2016          | 16 | F | Bivalent HPV     | 14 days  | CIS                                             | Isolated pontine demyelinating lesion     | Elevated MBP, No OCBs                                                  | IVMP                                         | Complete resolution             | No (2 year F/U)                |
|                                | 15 | F | Quadrivalent HPV | 16 days  | CIS                                             | Isolated pontine demyelinating lesion     | N/A                                                                    | No treatment                                 | Complete resolution             | No (2 year F/U)                |
| Menge et al. 2012              | 17 | F | Quadrivalent HPV | 4 months | TM then de novo NMOSD with AQP4                 | LETM                                      | N/A                                                                    | IVMP, PLEX, rituximab                        | Partial improvement             | Yes, developed NMOSD with AQP4 |
|                                | 14 | F | Quadrivalent HPV | 5 months | ON then de novo NMOSD with AQP4                 | LETM                                      | N/A                                                                    | IVMP and rituximab, MMF and prednisone later | Improvement in between relapses | Yes, developed NMOSD with AQP4 |
|                                | 13 | F | Quadrivalent HPV | Unknown  | Monophasic opticospinal NMOSD with unknown AQP4 | Spinal MRI lesions and optic nerve lesion | N/A                                                                    | No response                                  | Unknown (F/U)                   | Unknown                        |
|                                | 18 | F | Quadrivalent HPV | 5 months | Monophasic opticospinal NMOSD with unknown AQP4 | N/A                                       | N/A                                                                    | N/A                                          | Unknown                         | Unknown                        |
| Miravalle et al. 2009          | 23 | M | Yellow fever     | 21 days  | ADEM                                            | Infratentorial and thoracic demyelination | Pleocytosis, elevated protein, specific IgM antibodies to yellow fever | IVMP                                         | Complete resolution             | No (1 month F/U)               |



|                      |    |   |                              |           |                                            |                                                       |                                           |                                              |                                   |                                                                              |
|----------------------|----|---|------------------------------|-----------|--------------------------------------------|-------------------------------------------------------|-------------------------------------------|----------------------------------------------|-----------------------------------|------------------------------------------------------------------------------|
| Schoberl et al. 2017 | 23 | M | Yellow fever                 | 14 days   | De novo NMOSD with AQP4                    | LETM and area posterema lesion                        | Lymphocytic pleocytosis, elevated protein | IVMP; rituximab                              | Partial improvement               | Yes had right ON then myelitis a month later. Developed NMOSD with AQP4      |
| Carrasco et al. 2016 | 55 | F | Meningococcal B              | Few hours | ADEM                                       | Cortical and subcortical lesions + LETM               | Lymphocytic pleocytosis                   | None                                         | Complete resolution               | No (6 months F/U)                                                            |
| Alicino et al. 2014  | 59 | M | Virosomal season influenza   | 10 days   | ADEM                                       | Cerebral and cerebellar demyelination                 | Normal                                    | IVMP and IVIG                                | Continued deterioration of status | No (1 year F/U)                                                              |
| Kozic et al. 2014    | 7  | M | Oral polio                   | 20 days   | Transverse myelitis                        | LETM                                                  | Lymphocytic pleocytosis                   | IVIG and corticosteroid therapy and oral abx | Complete resolution               | No (10 months F/U)                                                           |
| Heekin et al. 2015   | 28 | M | Hepatitis B and TDP          | 11 days   | Monophasic opticospinal NMOSD without AQP4 | LETM, optic neuritis, thalamic, and capsular lesions. | Normal, no OCBs                           | IVMP and PLEX                                | Partial improvement               | No (9 months F/U).                                                           |
| Chang et al. 2016    | 30 | F | Quadrivalent HPV (Garadasil) | 3 days    | ON then de novo NMOSD with AQP4            | Enhancing right optic nerve                           | Normal                                    | IVMP followed by oral prednisolone           | Partial improvement               | Yes, two attacks of ON (different sides) following each dose of HPV vaccine. |

|                       |    |     |                               |         |                |                                                                |                                                           |                                         |                                                              |                                                             |
|-----------------------|----|-----|-------------------------------|---------|----------------|----------------------------------------------------------------|-----------------------------------------------------------|-----------------------------------------|--------------------------------------------------------------|-------------------------------------------------------------|
|                       |    |     |                               |         |                |                                                                |                                                           |                                         |                                                              | Developed NMOSD with AQP4                                   |
| Korematsu et al. 2014 | 11 | F   | Influenza                     | 2 days  | Optic neuritis | High T2 signal in optic nerve                                  | Pleocytosis and elevated protein                          | IVMP                                    | Continued deterioration                                      | N/A                                                         |
|                       | 12 | N/A | Influenza                     | 1 day   | Optic neuritis | High T2 signal in optic nerve                                  | Pleocytosis and elevated protein, high MBP, positive OCBs | IVMP                                    | Complete resolution                                          | Unknown F/U                                                 |
| Han et al. 2014       | 55 | F   | Varicella zoster              | 21 days | Optic neuritis | High signal intensities in bilateral intraorbital optic nerves | Normal                                                    | IVMP followed by oral prednisolone      | Significant improvement                                      | No (1 week)                                                 |
|                       | 44 | F   | Varicella zoster              | 7 days  | Optic neuritis | Swelling and enhancement of intraorbital optic nerve           | Normal                                                    | IVMP followed by oral prednisolone      | Significant improvement                                      | No (1 week)                                                 |
| O'Dowd et al. 2015    | 51 | M   | Typhoid fever and Hepatitis A | 14 days | Optic neuritis | Normal                                                         | Normal                                                    | IVMP followed by oral steroids and IVIG | Continued deterioration followed by stagnation at 2 year F/U | N/A                                                         |
| Manasseh et al. 2015  | 68 | M   | Influenza                     | 10 days | Optic neuritis | Normal                                                         | N/A                                                       | Oral prednisolone                       | Significant improvement                                      | Yes, after 1 year: presented 6 days after receiving another |

|                             |    |         |                                           |         |                                    |                                                                                         |                                                             |                                    |                                 |                                                             |
|-----------------------------|----|---------|-------------------------------------------|---------|------------------------------------|-----------------------------------------------------------------------------------------|-------------------------------------------------------------|------------------------------------|---------------------------------|-------------------------------------------------------------|
|                             |    |         |                                           |         |                                    |                                                                                         |                                                             |                                    |                                 | influenza vaccine.                                          |
| De Giacinto et al. 2015     | 30 | F       | Measles-Mumps-Rubella                     | 5 days  | Optic neuritis                     | Minor thickening of left optic nerve, corresponding to increased intensity of T2 signal | N/A                                                         | IVMP followed by oral prednisolone | Complete resolution             | No (19 days)                                                |
| Tan et al. 2010             | 55 | F       | Influenza                                 | 21 days | Optic neuritis                     |                                                                                         | Normal                                                      | IVMP followed by oral prednisolone | Complete resolution             | No (6 months)                                               |
| Cabrera-Maqueda et al. 2017 | 38 | F       | TDAP                                      | 21 days | Optic neuritis                     | Unilateral optic nerve high signal intensity                                            | Normal                                                      | IVMP                               | Complete resolution             | No (2 months F/U)                                           |
|                             | 38 | F       | TDAP                                      | 14 days | Optic neuritis                     | Optic nerve high signal intensity                                                       | Normal                                                      | None                               | Complete resolution             | No (1 month F/U)                                            |
| Arrab et al. 2015           | 7  | Unknown | Rabies                                    | 14 days | ADEM                               | Bilateral lesions of subcortical occipitoparietal white matter                          | Pleocytosis                                                 | IVMP followed by oral prednisolone | Partial improvement             | No (unknown F/U)                                            |
| Andrade et al. 2015         | 27 | M       | Inactivated influenza                     | 6 days  | ADEM                               | Hyperintense lesions of periventricular and subcortical white matter                    | Lymphocytic pleocytosis and elevated protein                | IVMP, IVIG                         | Partial improvement             | No (2 year F/U)                                             |
| Azumagawa et al. 2015       | 6  | M       | Measles-Rubella and Japanese encephalitis | 2 days  | Anti MOG positive multiphasic ADEM | Normal then cerebellar and temporal lesions then dorsal midbrain lesion.                | Lymphocytic pleocytosis and elevated protein, positive OCBs | IVMP and oral prednisolone         | Improvement between recurrences | Yes, 2 recurrences, Developed MOG positive multiphasic ADEM |

|                       |           |   |                       |         |      |                                                                   |                               |                                    |                         |                    |
|-----------------------|-----------|---|-----------------------|---------|------|-------------------------------------------------------------------|-------------------------------|------------------------------------|-------------------------|--------------------|
| Arai et al. 2014      | 48        | F | Inactivated influenza | 20 days | ADEM | Hyperintense lesion in corpus callosum                            | Elevated myelin basic protein | IVMP and IVIG                      | Partial improvement     | No (1 month F/U)   |
| Valenzise et al. 2014 | 15 months | F | Measles-Mumps-Rubella | 10 days | ADEM | Bilateral hyperintense lesions in white matter                    | Normal                        | Dexamethasone                      | Clinically stabilized   | Unknown F/U        |
| Becker et al. 2014    | 8         | M | Influenza (H1N1)      | 12 days | ADEM | Several multifocal hyperintense areas in cerebral white matter    | Lymphocytic pleocytosis       | IVMP followed by oral prednisolone | Complete resolution     | No (1 month F/U)   |
| Chen et al. 2016      | 42        | F | Inactivated influenza | 7 days  | ADEM | Subcortical, infratentorial, cervical, and thoracic demyelination | Pleocytosis, elevated protein | IVMP and IVIG                      | Significant improvement | Yes, 2 ADEM flares |

CSF: cerebrospinal fluid, ADEM: acute disseminated encephalomyelitis, PMN: polymorpho-nuclear, OCB: oligoclonal bands, IVMP: intravenous methylprednisolone, ON: optic neuritis, F/U: follow up, IVIG: intravenous immunoglobulins, PLEX: plasma exchange, N/A: not applicable, LETM: longitudinally extensive transverse myelitis, GBS: Guillian Barre syndrome, NMOSD: neuromyelitis optica spectrum disorder, AQP4: aquaporin 4, CIS: clinically isolated syndrome, MS: multiple sclerosis, MBP: myelin basic protein, TM: transverse myelitis, MOG: methyl oligodendrocyte glycoprotein.

#### Table S1 Works Cited:

- 1- Huynh W, Cordato DJ, Kehdi E, et al. Post-vaccination encephalomyelitis: literature review and illustrative case. *J Clin Neurosci*. 2008;15:1315-1322.
- 2- Sacheli A, Bauer R. Influenza vaccine-induced CNS demyelination in a 50-year-old male. *Am J Case Rep*. 2014;15:368-373.
- 3- Yuan J, Wang S, Guo X, et al. Acute disseminated encephalomyelitis following vaccination against hepatitis B in a child: a case report and literature review. *Case Rep Neurol Med*. 2016;2016:2401809.
- 4- Van Ussel I, Boer W, Parizel P, et al. Encephalitis related to a H1N1 vaccination: case report and review of the literature. *Clin Neurol Neurosurg*. 2014;124:8-15.
- 5- Shoamanesh A, Traboulsee A. Acute disseminated encephalomyelitis following influenza vaccination. *Vaccine*. 2011;29:8182-8185.

- 6- Lapphra K, Huh L, Scheifele DW. Adverse neurologic reactions after both doses of pandemic H1N1 influenza vaccine with optic neuritis and demyelination. *Pediatr Infect Dis J*. 2011;39:84-86.
- 7- Turkoglu R, Tuzun E. Brainstem encephalitis following influenza vaccination: favorable response to steroid treatment. *Vaccine*. 2009;27:7253-7256.
- 8- Machicado JD, Bhagya-Rao B, Davogustto G, et al. Acute disseminated encephalomyelitis following seasonal influenza vaccination in an elderly patient. *Clin Vaccine Immunol*. 2013;20:1485-1486.
- 9- Rubinov A, Beiran I, Krasnitz I, et al. Bilateral optic neuritis after inactivated influenza vaccination. *Isr Med Assoc J*. 2012;14:705-707.
- 10- Crawford C, Grazko MB, Raymond WR 4th, et al. Reversible blindness in bilateral optic neuritis associated with nasal flu vaccine. *Binocul Vis Strabolog Q Simms Romano*. 2012;27:171-173.
- 11- Fujii K, Suyama M, Chiba K, et al. Acute disseminated encephalomyelitis following 2009 H1N1 influenza vaccine. *Pediatr Int*. 2012;54:539-541.
- 12- Maeda K, Idehara R. Acute disseminated encephalomyelitis following 2009 H1N1 influenza vaccination. *Intern Med*. 2012;51:1931-1933.
- 13- Fernandes AF, Marchiori PE. Bithalamic compromise in acute disseminated encephalomyelitis following H1N1 influenza vaccine. *Arq Neuropsiquiatr* 2011;69:571.
- 14- Lee ST, Choe YJ, Moon WJ, et al. An adverse event following 2009 H1N1 influenza vaccination: a case of acute disseminated encephalomyelitis. *Korean J Pediatr*. 2011;54:422-424.
- 15- Hoshino T, Uchiyama Y, Ito E, et al. Simultaneous development of acute disseminated encephalomyelitis and Guillain-Barre syndrome associated with H1N1 09 influenza vaccination. *Intern Med*. 2012;51:1595-1598.
- 16- Sato N, Watanabe K, Ohta K, et al. Acute transverse myelitis and acute motor axonal neuropathy developed after vaccinations against seasonal and 2009 A/H1N1 influenza. *Intern Med*. 2011;50:503-507.
- 17- Kitazawa Y, Warabi Y, Bando M, et al. Elderly-onset neuromyelitis optica which developed after the diagnosis of prostate adenocarcinoma and relapsed after a 23-valent pneumococcal polysaccharide vaccination. *Intern Med*. 2012;51:103-107.
- 18- Huang EH, Lim SA, Lim PL, et al. Retrobulbar optic neuritis after hepatitis A vaccination in a HIV-infected patient. *Eye (Lond)*. 2009;23:2267-2271.
- 19- Erguven M, Guven S, Akyuz U, et al. Optic neuritis following hepatitis B vaccination in a 9-year-old girl. *J Chin Med Assoc*. 2009;72:594-597.
- 20- Moradian S, Ahmadi H. Early onset optic neuritis following measles-rubella vaccination. *J Ophthalmic Vis Res*. 2008;3:118-122.
- 21- Aydin H, Ozgul E, Agildere AM. Acute necrotizing encephalopathy secondary to diphtheria, tetanus toxoid and whole-cell pertussis vaccination: diffusion-weighted imaging and proton MR spectroscopy findings. *Pediatr Radiol*. 2010;40:1281-1284.

- 22- Chaves M, Riccio P, Patrucco L, et al. Longitudinal myelitis associated with yellow fever vaccination. *J Neurovirol*. 2009;15:348-350.
- 23- Cisse FA, Sidibe H, Morel Y, et al. Acute disseminated encephalomyelitis after tetanus vaccination of a pregnant woman in Senegal. *Med Sante Trop*. 2012;22:103-105.
- 24- Furukawa Y, Komai K, Yamada M. Neuromyelitis optica after Japanese encephalitis vaccination. *Eur J Neurol*. 2011;18:e26-e27.
- 25- Wildemann B, Jarius S, Hartmann M, et al. Acute disseminated encephalomyelitis following vaccination against human papilloma virus. *Neurology*. 2009;72(24):2132-2133.
- 26- Schaffer V, Wimmer S, Rotaru I, et al. HPV vaccine: a cornerstone of female health a possible cause of ADEM? *J Neurol*. 2008;255:1818-1820.
- 27- Sutton I, Lahoria R, Tan I, et al. CNS demyelination and quadrivalent HPV vaccination. *Mult Scler*. 2009;15:116-119.
- 28- DiMario FJ Jr, Hajjar M, Cieselski T. A 16-year-old girl with bilateral visual loss and left hemiparesis following an immunization against human papilloma virus. *J Child Neurol*. 2010;25:321-327.
- 29- Chang J, Campagnolo D, Vollmer TL, et al. Demyelinating disease and polyvalent human papilloma virus vaccination. *J Neurol Neurosurg Psychiatry*. 2011;82:1296-1298.
- 30- Akkad W, Salem B, Freeman JW, et al. Longitudinally extensive transverse myelitis following vaccination with nasal attenuated novel influenza A(H1N1) vaccine. *Arch Neurol*. 2010;67:1018-1020.
- 31- Dernholm JT, Neal A, Yan B, et al. Acute encephalomyelitis syndromes associated with H1N1 09 influenza vaccination. *Neurology*. 2010;75:2246-2248.
- 32- Gui L, Chen K, Zhang Y. Acute transverse myelitis following vaccination against H1N1 influenza: a case report. *Int J Clin Exp Pathol*. 2011;4:312-314.
- 33- Korn-Lubetzki I, Dano M, Raveh D. H1N1 vaccine-related acute transverse myelitis. *Isr Med Assoc J*. 2011;13:249-250.
- 34- Pellegrino P, Carnovale C, Perrone V, et al. Can HPV immunization cause ADEM? two case reports and literature review. *Mult Scler*. 2014;20:762-763.
- 35- Mendoza Plasencia Z, Gonzalez Lopez M, Fernandez Sanfiel ML, et al. Acute disseminated encephalomyelitis with tumefactive lesions after vaccination against human papillomavirus. *Neurologia*. 2010;25:58-59.
- 36- Sekiguchi K, Yasui N, Kowa H, et al. Two cases of acute disseminated encephalomyelitis following vaccination against human papilloma virus. *Int Med*. 2016;55:3181-3184.
- 37- Menge T, Cree B, Saleh A, et al. Neuromyelitis optica following human papillomavirus vaccination. *Neurology*. 2012;79:285-287.
- 38- Miravalle A, Biller J, Silva E, et al. Acute disseminated encephalomyelitis: yellow fever vaccination. *Arq Neuropsiquiatr*. 2009;67:710-711.
- 39- Schoberl F, Csanadi E, Eren O, et al. NMOSD triggered by yellow fever vaccination: an unusual clinical presentation with segmental painful erythema. *Mult Scler Relat Disord*. 2017;11:43-44.

- 40- Carrasco Garcia de Leon SIRA, Barragan JMF. Acute disseminated encephalomyelitis secondary to serogroup B meningococcal vaccine. *J Neurol Sci*. 2016;370:53-54.
- 41- Alicino C, Infante MT, Gandoglia I, et al. Acute disseminated encephalomyelitis with severe neurological outcomes following virosomal seasonal influenza vaccine. *Hum Vaccin Immunother*. 2014;10:1969-1973.
- 42- Kozic D, Turkulov V, Bjelan M, et al. Extensive myelitis after oral polio vaccination: MRI features. *JBR-BTR*. 2014;97:358-360.
- 43- Heekin R, Gandhi C, Robertson D. Seronegative neuromyelitis optica spectrum disorder following exposure to hepatitis B vaccination. *Case Rep Neurol*. 2015;7:78-83.
- 44- Chang H, Lee HL, Yeo M, et al. Recurrent optic neuritis and neuromyelitis optica-IgG following first and second human papillomavirus vaccinations. *Clin Neurol Neurosurg*. 2016;144:126-128.
- 45- Korematsu S, Miyahara H, Kakita A, et al. Elevated serum anti-phosphatidylcholine IgG antibodies in patients with influenza vaccination-associated optic neuritis. *Vaccine*. 2014;32:6345-6348.
- 46- Han SB, Hwang JM, Kim JS, et al. Optic neuritis following Varicella zoster vaccination: report of two cases. *Vaccine*. 2014;32:4881-4884.
- 47- O'Dowd S, Bafiq R, Ryan A, et al. Severe bilateral optic neuritis post Hepatitis A virus (HAV) and typhoid fever vaccination. *J Neurol Sci*. 2015;357:300-301.
- 48- Manasseh G, Donovan D, Shao EH, Taylor SR. Bilateral sequential non-arteritic anterior ischaemic optic neuropathy following repeat influenza vaccination. *Case Rep Ophthalmol*. 2014;5:267-269.
- 49- De Giacinto C, Guaglione E, Leon PE, et al. Unilateral optic neuritis: a rare complication after measles-mumps-rubella vaccination in a 30-year-old woman [published online ahead of print April 19, 2016]. *Case Rep Ophthalmol Med*. doi:10.1155/2016/8740264.
- 50- Tan FU, Akarsh C, Gullu R, et al. Bilateral optic neuritis after influenza vaccination. *Neuro-Ophthalmology*. 2010;34:115-117.
- 51- Cabrera-Maqueda JM, Hernandez-Clares R, Baidez-Guerrero AE, et al. Optic neuritis in pregnancy after Tdap vaccination: report of two cases. *Clin Neurol Neurosurg*. 2017;160:116-118.
- 52- Arrab R, Draiss G, Rada N, et al. Acute disseminated encephalomyelitis after rabies vaccination: a case report. *Arch Pediatr*. 2015;22:47-49.
- 53- Andrade SD, Andrade MG, Santos PJ. Acute disseminated encephalomyelitis following inactivated influenza vaccination in the Brazilian Amazon: a case report. *Rev Soc Bras Med Trop*. 2015;48:498-500.
- 54- Azumagawa K, Nomura S, Shigeri Y, et al. Post-vaccination MDEM associated with MOG antibody in a subclinical *Chlamydia* infected boy. *Brain Dev*. 2016;38:690-693.
- 55- Arai M, Takagi D, Nagao R. Acute disseminated encephalomyelitis following influenza vaccination: report of a case with callosal disconnection syndrome. *Rinsho Shinkeigaku*. 2014;54:135-139.

- 56- Valenzise M, Cascio A, Wasniewska M, et al. Post vaccine acute disseminated encephalomyelitis as the first manifestation of chromosome 22q11.2 deletion syndrome in a 15-month old baby: a case report. *Vaccine*. 2014;32:5552-5554.
- 57- Becker MM, Ranzan J, Magalhaes LV, et al. Post-H1N1 vaccine acute disseminated encephalomyelitis. *Pediatr Int*. 2014;56:437-438.
- 58- Chen WT, Huang YC, Peng MC, et al. Acute disseminated encephalomyelitis after influenza vaccination: a case report. *Crit Care Nurse*. 2016;36:e1-e6.
